1 **Recovery of 447 Eukaryotic bins reveals major challenges for**

2 **Eukaryote genome reconstruction from metagenomes.**

3 Joao Pedro Saraiva<sup>1</sup>, Alexander Bartholomäus<sup>2</sup>, Rodolfo Brizola Toscan<sup>1</sup>, Petr Baldrian<sup>3</sup>, Ulisses  
4 Nunes da Rocha<sup>1\*</sup>

5 <sup>1</sup> Department of Environmental Microbiology, Helmholtz Centre for Environmental Research –  
6 UFZ GmbH, Leipzig, Saxony, 04318, Germany

7 <sup>2</sup> GFZ German Research Centre for Geosciences, Section 3.7 Geomicrobiology, Telegrafenberg,  
8 Potsdam, 14473, Germany

9 <sup>3</sup> Laboratory of Environmental Microbiology, Institute of Microbiology of the Czech Academy  
10 of Sciences, Videnska 1083, Praha 4, 14220, Czech Republic

11 Joao Pedro Saraiva: joao.saraiva@ufz.de

12 Alexander Bartholomäus: abartho@gfz-potsdam.de

13 Rodolfo Brizola Toscan: rodolfo.toscan@ufz.de

14 Petr Baldrian: baldrian@biomed.cas.cz

15 \*Ulisses Nunes da Rocha: ulisses.rocha@ufz.de

16 \* Corresponding author

17

18

19

20

## 21 **Abstract**

22 An estimated 8.7 million eukaryotic species exist on our planet. However, recent tools for  
23 taxonomic classification of eukaryotes only dispose of 734 reference genomes. As most  
24 Eukaryotic genomes are yet to be sequenced, the mechanisms underlying their contribution to  
25 different ecosystem processes remain untapped. Although approaches to recover Prokaryotic  
26 genomes have become common in genome biology, few studies have tackled the recovery of  
27 Eukaryotic genomes from metagenomes. This study assessed the reconstruction of Eukaryotic  
28 genomes using 215 metagenomes from diverse environments using the EukRep pipeline. We  
29 obtained 447 eukaryotic bins from 15 classes (e.g., Saccharomycetes, Sordariomycetes, and  
30 Mamiellophyceae) and 16 orders (e.g., Mamiellales, Saccharomycetales, and Hypocreales).  
31 More than 73% of the obtained eukaryotic bins were recovered from samples whose biomes  
32 were classified as host-associated, aquatic and anthropogenic terrestrial. However, only 93 bins  
33 showed taxonomic classification to (9 unique) genera and 17 bins to (6 unique) species. A total  
34 of 193 bins contained completeness and contamination measures. Average completeness and  
35 contamination were 44.64% ( $\sigma=27.41\%$ ) and 3.97% ( $\sigma=6.53\%$ ), respectively. *Micromonas*  
36 *commoda* was the most frequent taxa found while *Saccharomyces cerevisiae* presented the  
37 highest completeness, possibly resulting from a more significant number of reference genomes.  
38 However, mapping eukaryotic bins to the chromosomes of the reference genomes suggests that  
39 completeness measures should consider both single-copy genes and chromosome coverage.  
40 Recovering eukaryotic genomes will benefit significantly from long-read sequencing, intron  
41 removal after assembly, and improved reference genomes databases.

42 **Keywords:** Eukaryotes, genome-resolved metagenomics, Saccharomycetales, Mamiellales,  
43 Hypocreales

## 44 **Introduction**

45 Eukaryotes play critical roles in ecosystem processes by decomposing organic material (e.g.,  
46 decomposition processes by fungi in soil) (Baldrian et al., 2012), predated on other microbes, or  
47 producing organic compounds from inorganic compounds (Bik et al., 2012; Bulan et al., 2018;  
48 Lind & Pollard, 2021; West, Probst, Grigoriev, Thomas, & Banfield, 2018). An estimated 8.7  
49 million eukaryotic species inhabit our planet (Sweetlove, 2011), but as of 4<sup>th</sup> January 2022, only  
50 slightly more than 54000 eukaryotic reference genomes exist in RefSeq (O’Leary et al., 2016).  
51 However, recent studies have predicted more than six million species of fungi alone (Baldrian,  
52 Větrovský, Lepinay, & Kohout, 2021) which suggests that the total counts of eukaryotes greatly  
53 exceed previous estimations.

54 Despite current efforts, the ability to recover eukaryotic genomes is limited compared to  
55 prokaryotic genome recovery (West et al., 2018). Nevertheless, recent tools such as EukRep  
56 (West et al., 2018) and EukDetect (Lind & Pollard, 2021) aim to improve eukaryotic genome  
57 reconstruction from natural environments (Peng et al., 2021). However, EukRep only uses 734 to  
58 perform taxonomic classification. Further, tools such as BUSCO (Waterhouse et al., 2017) and  
59 EukCC (Saary, Mitchell, & Finn, 2020) are employed to measure the quality of eukaryotic  
60 genomes (completeness and contamination). However, BUSCO only provides completeness  
61 measures and does not ascertain contamination. The reconstruction of eukaryotic genomes from  
62 whole shotgun sequencing also faces additional challenges compared to prokaryotes. For  
63 example, eukaryotes are present in lower abundance when compared to prokaryotes (Lind &  
64 Pollard, 2021). To reconstruct less abundant species, increased sequencing depths are required.  
65 Additionally, the low number of reference genomes in databases used for taxonomy assignment  
66 limits our ability to obtain a realistic overview of eukaryote diversity (Pawlowski et al., 2012).

67 Other challenges in the recovery of eukaryotic genomes include the existence of multiple  
68 chromosomes and the share of repeat regions (Delmont & Eren, 2016).

69 Large-scale microbiome studies usually do not include the reconstruction of microbial  
70 eukaryotes (Nayfach et al., 2020; Nayfach, Shi, Seshadri, Pollard, & Kyrpides, 2019; Parks et al.,  
71 2017; Tully, Graham, & Heidelberg, 2018; Zhu et al., 2019), even in environments where they  
72 are key players. This bias towards prokaryotes may lead to incorrect or incomplete assertions on  
73 the contribution of microbes to ecosystems processes. Thus, studies including all domains of life  
74 would provide better insights into the role and effect of microbiomes in environmental and  
75 human health. Further, the inclusion of eukaryotes would also benefit studies that aim to catalog,  
76 at the genome level, all of Earth's microbiomes (Nayfach et al., 2020). In this study, we aim to:  
77 1) assess our ability to recover eukaryotic genomes from natural environments; and 2) compare  
78 the quality of the best Eukaryotic metagenome-assembled genomes from this study to reference  
79 genomes.

80

## 81 **Materials and Methods**

### 82 **Metagenome dataset**

83 A total of 6000 curated metagenomes were collected from the Collaborative Multi-domain  
84 Exploration of Terrestrial metagenomes (CLUE-TERRA) consortium  
85 (<https://www.ufz.de/index.php?en=47300>). The first task of the curation process was to filter for  
86 true whole genome shotgun (WGS) libraries since non-metagenomic libraries in the Sequence  
87 Read Archive (SRA) can be wrongfully annotated as metagenomic. This was achieved by using  
88 PARTIE (Torres, Edwards, & McNair, 2017). Next, metagenomes with sequence quality scores

89 below 70%, obtained via SRA-Tinder ([https://github.com/NCBI-Hackathons/SRA\\_Tinder](https://github.com/NCBI-Hackathons/SRA_Tinder)), were  
90 discarded. To allow for comparative studies, only metagenomes sequenced using the Illumina  
91 sequencing platform and with a minimum of eight million paired-end reads per library were kept.  
92 Lastly, given the consortium's focus on terrestrial environments, all libraries containing  
93 coordinates or terms for sea environments were excluded.

#### 94 **Pre-processing and Library assembly**

95 The raw reads were quality controlled using metaWrap (Uritskiy, DiRuggiero, & Taylor, 2018)  
96 with default parameters. Trimming of raw reads was performed using TrimGalore  
97 (<https://github.com/FelixKrueger/TrimGalore>) with the default settings. High-quality reads  
98 (using default Phred scores from TrimGalore) were aligned to potential host genomes using  
99 bmtagger (Rotmistrovsky & Agarwala, 2011). The goal of this alignment is to remove host  
100 contamination and read pairs with only a single aligned read from the metagenomic libraries.  
101 Read Quality control was performed using FASTQC (“Babraham Bioinformatics - FastQC A  
102 Quality Control Tool for High Throughput Sequence Data,” n.d.).

103 We used metaSpades (Nurk, Meleshko, Korobeynikov, & Pevzner, 2017) to assemble the  
104 different samples using default parameters.

#### 105 **Binning**

106 Before binning, we used EukRep (West et al., 2018) to separate eukaryotic contigs from  
107 prokaryotic ones. Next, binning of eukaryotic assemblies was performed using CONCOCT  
108 (Alneberg et al., 2014). Bins with size below 2 Mb were removed. Bin quality was assessed  
109 using the EukCC (Saary et al., 2020) and BUSCO (Waterhouse et al., 2017) pipelines.

#### 110 **Taxonomic classification**

111 Taxonomy was assigned using taxator-tk (Dröge, Gregor, & McHardy, 2015).

## 112 **Coverage calculation**

113 Coverage refers to the average number of reads aligned to known reference bases. Here, we  
114 calculated coverage by multiplying the number of mapped reads by the average length of reads  
115 in the libraries, then dividing by the size of the bins in base pairs (Equation 1).

116 **Equation 1:** coverage = mapped reads \* average read length / size of bin (bp)

## 117 **Mapping of species-level, high-quality eukaryotic bins**

118 To assess genome completeness, the high-quality eukaryotic bins (classified to species level)  
119 were assembled into chromosomes. This was achieved using Chromosomer (Tamazian et al.,  
120 2016). Next, the assembled chromosomes were aligned to the chromosomes of the reference  
121 genomes using Minimap2 (Li, 2018, p. 2). The divergence rates were calculated based on the  
122 pairwise sequence alignments generated from Minimap2 using the pafr R package, with default  
123 parameters (<https://rdrr.io/github/dwinter/pafr/>) (Table 1).

## 124 **Gene prediction and Functional annotation**

125 Genes were predicted using the GeneMark-ES model (Besemer, Lomsadze, & Borodovsky,  
126 2001) and annotated using MAKER2 (Holt & Yandell, 2011, p. 2) with RepBase gene database  
127 (Bao, Kojima, & Kohany, 2015). The functions of interest in this work are based on the work by  
128 Kieft and collaborators (Kieft et al., 2018) involving carbon and nitrogen cycling. Genes of the  
129 reference genomes *Bathycoccus prasinos* and *Micromonas commoda* involved in carbon fixation  
130 (Supplementary data – Table S1 and Table S2, respectively) and nitrogen metabolism

131 (Supplementary data – Table S3 and Table S4, respectively) were extracted from Kyoto  
132 Encyclopedia of Genes and Genomes (KEGG).  
133 To demonstrate the potential contribution of eukaryotes to carbon fixation and nitrogen cycling,  
134 we selected EukBins CTeuk-1331 (*B. prasinos*) and CTeuk-1332 (*M. commoda*) since they were  
135 recovered from the same metagenomic libraries used in Kieft and collaborator's study and  
136 presented the highest quality scores in their taxa. Next, we submitted the gene sequences  
137 predicted by MAKER2 to GhostKOALA (Kanehisa, Sato, & Morishima, 2016). The mapping of  
138 K numbers to each gene was saved in tabular format.

139

## 140 **Results**

141 We recovered 447 Eukaryotic bins (EukBins) from 215 terrestrial samples. Completeness and  
142 contamination measurements using EukCC (Saary et al., 2020) were only obtained for 193  
143 EukBins. The average completeness and contamination were 44.64% ( $\sigma=27.41$ ) and 3.97 ( $\sigma=$   
144 6.53), respectively. Completeness measurements using BUSCO (Waterhouse et al., 2017) were  
145 only obtained for 9 EukBins averaging 31.21% ( $\sigma=37.24$ ). Due to BUSCO's low number of bins  
146 and average completeness values, only the results obtained with EukCC were used in further  
147 analyses. A total of 153 EukBins were classified to family level (Supplementary Table S5). For  
148 subsequent analyses, we filtered EukBins with quality scores above or equal to 53 as well as  
149 those without EukCC completeness and contamination values (Supplementary Table S5). Our  
150 data had a total of 47 medium/high quality EukBins (Quality score  $\geq 53$ ) of which only 13 were  
151 classified to species level (spanning 5 unique taxa). The most frequent species-level taxonomy  
152 assigned to EukBins, was *Micromonas commoda* (7) recovered from estuary samples. The

153 second most frequent species-level assigned taxonomy was *Saccharomyces cerevisiae* (3)  
154 recovered from synthetic and fermentation metagenomes. EukBins classified as *S. cerevisiae*  
155 also presented the highest genome coverage in the respective genomic libraries, ranging from  
156 ~29 to 192 times coverage. In contrast, *Bathycoccus prasinus*-classified EukBins showed only  
157 approximately six times coverage in their samples (Supplementary data – Table S5). The  
158 frequencies of each taxon, at different levels as well as per biome is shown in Figure 1. The  
159 species-level, medium/high quality EukBins were reassembled into chromosomes using  
160 Chromosomer (Tamazian et al., 2016) and mapped to the chromosomes of the reference  
161 genomes using Minimap2 (Li, 2018, p. 2). The pairwise alignments for each reassembled Eukbin  
162 are shown in the Supplementary data (Table S6). Assembled chromosomes with the highest  
163 divergences (per base differences between a query and target sequence) to the reference  
164 chromosomes were found in EukBins classified as *M. commoda* (average 0.154,  $\sigma=0.012$ )  
165 (Figure 2A). In contrast, assembled chromosomes of EukBins classified as *S. cerevisiae* showed  
166 the lowest divergences when compared to the reference chromosomes (average 0.029,  $\sigma=0.017$ )  
167 (Figure 2B). The complete set of results of divergences between assembled and reference  
168 chromosomes is shown in the Supplementary data - Table S7. Additionally, the mapping of the  
169 chromosomes of the EukBins to the chromosomes of the reference genomes is shown in the  
170 Supplementary data – Figures S1-S13.

171 Annotation of EukBins yielded, on average, 4106, 4435, 4573, 4619, and 4150 protein-encoding  
172 genes in *Saccharomyces cerevisiae*, *Komagataella phaffii*, *Pichia kudriavzevii*, *Micromonas*  
173 *commoda* and *Bathycoccus prasinus*, respectively. However, the number of predicted genes in  
174 *M. commoda* and *B. prasinus* EukBins only accounted for 45.57% and 52.54% of their reference  
175 genomes, respectively (Supplementary data – Table S8).



176 Functional annotation of *B. prasinus* CTeuk-1331 revealed the presence of 10 genes involved in  
177 nitrogen metabolism and 32 genes involved in carbon fixation (Supplementary data - Table S9).

178 Functional annotation of CTeuk-1332 (*M. commoda*), revealed the presence of two genes  
179 involved in nitrogen metabolism and 34 genes in carbon fixation (Supplementary data - Table  
180 S10).

181 Annotation of the species-level, high-quality EukBins is available in the Supplementary data –  
182 Table S11.

### 183 **Discussion**

184 Our results demonstrate that, despite current efforts, our ability to reconstruct high-quality  
185 Eukaryotes genomes is in its early stages of development. Both quality and taxonomic  
186 assignments of the metagenome-assembled eukaryotic bins (EukBins) are substantially lower  
187 when compared to prokaryotes which can be attributed mainly to the lower availability of  
188 reference genomes and marker genes (Saary et al., 2020; Waterhouse et al., 2017). Another  
189 factor that may influence our results is the difficulty of assemblers dealing with diploid taxa  
190 given that genes may exist in two alleles with various similarities (Zhang, Zhou, Weng, &  
191 Sidow, 2020). The lower taxonomic diversity is evident in Figure 1, where we exhibit the  
192 frequency counts of taxonomies across all libraries containing EukBins. Given that current  
193 metagenomic methods rely on comparisons to known genomes, a higher number of eukaryotic  
194 reference genomes would help to identify species in complex communities (Loeffler et al.,  
195 2020). For example, in the reference database used by taxator-tk, *S. cerevisiae* was represented  
196 by more than 550 sequences while *M. commoda* was only represented by two. The quality of  
197 reconstructed genomes from metagenomes is usually calculated by the presence and numbers of  
198 Single Copy Genes (SCGs) (Saary et al., 2020). EukCC (Saary et al., 2020) and BUSCO

199 (Waterhouse et al., 2017) both use SCGs to estimate the quality of eukaryotic genomes.  
200 However, the SCG sets used by each tool differ in composition and application (e.g., BUSCO  
201 requires the user to define which sets of SCGs to use). The more unique and non-repeated SCGs  
202 in a bin, the higher the quality determined by either tool. However, even in high-quality EukBins  
203 such as CTeuk-1741 (95.96% completeness and 0.34 contamination) (classified as *S. cerevisiae*),  
204 significant parts of each chromosome can be missing and/or contain misplaced reads  
205 (Supplementary Figure S1). In our study, we also calculated the coverage of each EukBin. This  
206 measure allowed us to infer the relative dominance of the draft genome within a given sample.  
207 Our results showed an elevated coverage of *S. cerevisiae* EukBins. This is not surprising as the  
208 metagenomic libraries were generated from actively grown culture samples from wine barrels  
209 (PRJNA390460). In addition, the identification of *M. commoda* and *B. prasinus* EukBins in  
210 studies not accounting for eukaryotic presence suggest an incomplete overview of the entire  
211 community in ecosystem processes.

212 The genomic structure of eukaryotic genomes may also help to explain the differences in  
213 taxonomic classification. Eukaryotic genomes are usually differentiated from prokaryotic  
214 genomes by size and complexity (Keeling, 2019). For example, introns in eukaryotic genomes  
215 interfere with gene calling (Roy & Penny, 2007), and gene calling is difficult due to frequent  
216 gene or genome duplication events (Kaltenegger, Leng, & Heyl, 2018). Furthermore, intron  
217 presence and number vary across eukaryotic species, making it harder to accurately predict genes  
218 in some species. For example, *Aspergillus fumigatus* has 18293 introns compared to the 266  
219 found in *Saccharomyces cerevisiae* (Roy & Penny, 2007).

220 Most studies involving genome annotations use short-reads and quality assessment tools such as  
221 BUSCO (Waterhouse et al., 2017) and EukCC (Saary et al., 2020). The use of short reads can

222 influence the accuracy of gene predictions since short reads may not cover a gene's total length  
223 (Pearman, Freed, & Silander, 2020), and SCGs may not provide a realistic measure of the  
224 completeness of complex organisms such as eukaryotes. In this study, all metagenomes were  
225 sequenced using short reads, which might explain the low number of species-level classifications  
226 (five unique taxa) in high-quality Eukbins. The pairwise alignments of the reassembled EukBins  
227 to their respective reference genomes revealed that it is possible to reconstruct a large amount of  
228 the genome using short-read sequencing when a high number of reference genomes exist (e.g.,  
229 *Saccharomyces cerevisiae*). We also observed a similar relation between assemblies and  
230 reference genomes when calculating divergence rates. Genome reconstruction exhibited higher  
231 divergence rates in species with a low number of reference genomes such as *M. commoda*. Our  
232 data showed many gaps in the mapping of the EukBins to the reference chromosomes, which  
233 may be linked to intron presence. Introns may also play a role in accurately predicting genes, as  
234 shown by the low number of predicted genes in *B. prasinus* and *M. commoda* EukBins  
235 (Supplementary data - Table S4). Thus, the use of new sequencing technologies that provide  
236 longer continuous sequences (e.g. Oxford Nanopore or PacBio sequencing) might be necessary  
237 to facilitate the recovery of high-quality Eukaryotic genomes from metagenomes (Amarasinghe  
238 et al., 2020).

239 In terms of microbiome studies, we recommend including results from eukaryotic genome  
240 recovery to avoid missing potential key players in ecosystem processes. For example, Kieft and  
241 collaborators (Kieft et al., 2018) studied the relationship between microbial community structure  
242 and function in carbon and nitrogen cycling in estuaries. Our results revealed the presence of *B.*  
243 *prasinus* and *M. commoda*. *B. prasinus* is responsible for generating almost 50% of  
244 photosynthetic picoeukaryote carbon (Vaulot et al., 2012). The carbon provided by *B. prasinus*

245 benefits the growth rates of *M. commoda* since it increases the supply rates of ammonia to the  
246 nitrogen assimilation pathway (Cuvelier et al., 2017). Functional annotation of the *B. prasinos*  
247 and *M. commoda* EukBins, revealed the presence of multiple genes involved in carbon fixation  
248 and nitrogen metabolism. However, *nii* genes, which are responsible for converting nitrite to  
249 ammonia, were missing, unlike the reference genomes. The miss-annotation of genes present in  
250 *B. prasinos* and *M. commoda* highlights the challenge of reconstructing near-complete  
251 eukaryotic genomes due to insufficient reference genomes in genome repositories. Still,  
252 including the reconstruction of eukaryotic genomes to the study by Kieft and collaborators (Kieft  
253 et al., 2018) would provide a more complete picture of carbon and nitrogen cycling in aquatic  
254 environments.

255 **In summary**, performing single domain genome reconstruction from natural environments leads  
256 to an incomplete overview of microbial communities' diversity and functional potential. To  
257 obtain accurate representations of all species present in an ecosystem, substantial efforts in tool  
258 development to identify species in all domains are still required. Eukaryotes play vital roles in  
259 ecosystems ranging from complementing the activities of other microbes to performing  
260 phototrophic and saprotrophic processes and predation (del Campo, Bass, & Keeling, 2020).  
261 Despite their importance, very few microbiome studies include the reconstruction and analysis of  
262 eukaryotes. The major difficulty in their inclusion lies in our ability to reconstruct their genome  
263 and perform genome annotation accurately. Increasing the number and quality of reference  
264 genomes in public databases coupled with developing tools for intron identification and removal  
265 from eukaryotic genomes may result in better genome reconstructions and gene predictions. A  
266 possible avenue to achieve this goal is to promote long-read sequencing technologies. While we  
267 did reconstruct almost 950 eukaryotic genomes, only 29 were of high quality and classified to

268 species level. Still, the identified species showed promise in adding layers of information to the  
269 original studies. Thus, the reconstruction of more high-quality genomes will bring us closer to a  
270 more realistic overview and understanding of biodiversity as a whole and how Eukaryotes  
271 contribute to different ecosystem processes.

## 272 **Acknowledgments**

273 We want to thank Felipe Borim Correa for his advice during the selection of metagenomes. We  
274 would also like to thank all members of the CLUE-TERRA consortium  
275 (<https://www.ufz.de/index.php?en=47300>) for their advice in the reconstruction of eukaryotic  
276 genomes from metagenomes.

## 277 **References**

- 278 Alneberg, J., Bjarnason, B. S., Bruijn, I. de, Schirmer, M., Quick, J., Ijaz, U. Z., ... Quince, C.  
279 (2014). Binning metagenomic contigs by coverage and composition. *Nature Methods*,  
280 *11*(11), 1144–1146. <https://doi.org/10.1038/nmeth.3103>
- 281 Amarasinghe, S. L., Su, S., Dong, X., Zappia, L., Ritchie, M. E., & Gouil, Q. (2020).  
282 Opportunities and challenges in long-read sequencing data analysis. *Genome Biology*,  
283 *21*(1), 30. <https://doi.org/10.1186/s13059-020-1935-5>
- 284 Babraham Bioinformatics—FastQC A Quality Control tool for High Throughput Sequence Data.  
285 (n.d.). Retrieved October 25, 2021, from  
286 <https://www.bioinformatics.babraham.ac.uk/projects/fastqc/>
- 287 Baldrian, P., Kolařík, M., Štursová, M., Kopecký, J., Valášková, V., Větrovský, T., ...  
288 Voříšková, J. (2012). Active and total microbial communities in forest soil are largely  
289 different and highly stratified during decomposition. *The ISME Journal*, *6*(2), 248–258.  
290 <https://doi.org/10.1038/ismej.2011.95>

- 291 Baldrian, P., Větrovský, T., Lepinay, C., & Kohout, P. (2021). High-throughput sequencing view  
292 on the magnitude of global fungal diversity. *Fungal Diversity*.  
293 <https://doi.org/10.1007/s13225-021-00472-y>
- 294 Bao, W., Kojima, K. K., & Kohany, O. (2015). Repbase Update, a database of repetitive  
295 elements in eukaryotic genomes. *Mobile DNA*, 6(1), 11. [https://doi.org/10.1186/s13100-](https://doi.org/10.1186/s13100-015-0041-9)  
296 [015-0041-9](https://doi.org/10.1186/s13100-015-0041-9)
- 297 Besemer, J., Lomsadze, A., & Borodovsky, M. (2001). GeneMarkS: A self-training method for  
298 prediction of gene starts in microbial genomes. Implications for finding sequence motifs  
299 in regulatory regions. *Nucleic Acids Research*, 29(12), 2607–2618.
- 300 Bik, H. M., Porazinska, D. L., Creer, S., Caporaso, J. G., Knight, R., & Thomas, W. K. (2012).  
301 Sequencing our way towards understanding global eukaryotic biodiversity. *Trends in*  
302 *Ecology & Evolution*, 27(4), 233–243. <https://doi.org/10.1016/j.tree.2011.11.010>
- 303 Bulan, D. E., Wilantho, A., Tongshima, S., Viyakarn, V., Chavanich, S., & Somboonna, N.  
304 (2018). Microbial and Small Eukaryotes Associated With Reefs in the Upper Gulf of  
305 Thailand. *Frontiers in Marine Science*, 5, 436. <https://doi.org/10.3389/fmars.2018.00436>
- 306 Cuvelier, M. L., Guo, J., Ortiz, A. C., Baren, M. J. van, Tariq, M. A., Partensky, F., & Worden,  
307 A. Z. (2017). Responses of the picoprasinophyte *Micromonas commoda* to light and  
308 ultraviolet stress. *PLOS ONE*, 12(3), e0172135.  
309 <https://doi.org/10.1371/journal.pone.0172135>
- 310 del Campo, J., Bass, D., & Keeling, P. J. (2020). The eukaryome: Diversity and role of  
311 microeukaryotic organisms associated with animal hosts. *Functional Ecology*, 34(10),  
312 2045–2054. <https://doi.org/10.1111/1365-2435.13490>

- 313 Delmont, T. O., & Eren, A. M. (2016). Identifying contamination with advanced visualization  
314 and analysis practices: Metagenomic approaches for eukaryotic genome assemblies.  
315 *PeerJ*, 4, e1839. <https://doi.org/10.7717/peerj.1839>
- 316 Dröge, J., Gregor, I., & McHardy, A. C. (2015). Taxator-tk: Precise taxonomic assignment of  
317 metagenomes by fast approximation of evolutionary neighborhoods. *Bioinformatics*  
318 (*Oxford, England*), 31(6), 817–824. <https://doi.org/10.1093/bioinformatics/btu745>
- 319 Holt, C., & Yandell, M. (2011). MAKER2: An annotation pipeline and genome-database  
320 management tool for second-generation genome projects. *BMC Bioinformatics*, 12(1),  
321 491. <https://doi.org/10.1186/1471-2105-12-491>
- 322 Kaltenecker, E., Leng, S., & Heyl, A. (2018). The effects of repeated whole genome duplication  
323 events on the evolution of cytokinin signaling pathway. *BMC Evolutionary Biology*,  
324 18(1), 76. <https://doi.org/10.1186/s12862-018-1153-x>
- 325 Kanehisa, M., Sato, Y., & Morishima, K. (2016). BlastKOALA and GhostKOALA: KEGG  
326 Tools for Functional Characterization of Genome and Metagenome Sequences. *Journal*  
327 *of Molecular Biology*, 428(4), 726–731. <https://doi.org/10.1016/j.jmb.2015.11.006>
- 328 Keeling, P. J. (2019). Combining morphology, behaviour and genomics to understand the  
329 evolution and ecology of microbial eukaryotes. *Philosophical Transactions of the Royal*  
330 *Society B: Biological Sciences*, 374(1786), 20190085.  
331 <https://doi.org/10.1098/rstb.2019.0085>
- 332 Kieft, B., Li, Z., Bryson, S., Crump, B. C., Hettich, R., Pan, C., ... Mueller, R. S. (2018).  
333 Microbial Community Structure–Function Relationships in Yaquina Bay Estuary Reveal  
334 Spatially Distinct Carbon and Nitrogen Cycling Capacities. *Frontiers in Microbiology*, 9,  
335 1282. <https://doi.org/10.3389/fmicb.2018.01282>

- 336 Li, H. (2018). Minimap2: Pairwise alignment for nucleotide sequences. *Bioinformatics (Oxford,*  
337 *England)*, 34(18), 3094–3100. <https://doi.org/10.1093/bioinformatics/bty191>
- 338 Lind, A. L., & Pollard, K. S. (2021). Accurate and sensitive detection of microbial eukaryotes  
339 from whole metagenome shotgun sequencing. *Microbiome*, 9(1), 58.  
340 <https://doi.org/10.1186/s40168-021-01015-y>
- 341 Loeffler, C., Karlsberg, A., Martin, L. S., Eskin, E., Koslicki, D., & Mangul, S. (2020).  
342 Improving the usability and comprehensiveness of microbial databases. *BMC Biology*,  
343 18, 37. <https://doi.org/10.1186/s12915-020-0756-z>
- 344 Nayfach, S., Roux, S., Seshadri, R., Udworthy, D., Varghese, N., Schulz, F., ... Eloë-Fadrosh, E.  
345 A. (2020). A genomic catalog of Earth’s microbiomes. *Nature Biotechnology*, 1–11.  
346 <https://doi.org/10.1038/s41587-020-0718-6>
- 347 Nayfach, S., Shi, Z. J., Seshadri, R., Pollard, K. S., & Kyrpides, N. C. (2019). New insights from  
348 uncultivated genomes of the global human gut microbiome. *Nature*, 568(7753), 505–510.  
349 <https://doi.org/10.1038/s41586-019-1058-x>
- 350 Nurk, S., Meleshko, D., Korobeynikov, A., & Pevzner, P. A. (2017). metaSPAdes: A new  
351 versatile metagenomic assembler. *Genome Research*, 27(5), 824–834.  
352 <https://doi.org/10.1101/gr.213959.116>
- 353 O’Leary, N. A., Wright, M. W., Brister, J. R., Ciuffo, S., Haddad, D., McVeigh, R., ... Pruitt, K.  
354 D. (2016). Reference sequence (RefSeq) database at NCBI: Current status, taxonomic  
355 expansion, and functional annotation. *Nucleic Acids Research*, 44(D1), D733-745.  
356 <https://doi.org/10.1093/nar/gkv1189>
- 357 Parks, D. H., Rinke, C., Chuvochina, M., Chaumeil, P.-A., Woodcroft, B. J., Evans, P. N., ...  
358 Tyson, G. W. (2017). Recovery of nearly 8,000 metagenome-assembled genomes



- 359 substantially expands the tree of life. *Nature Microbiology*, 2(11), 1533–1542.  
360 <https://doi.org/10.1038/s41564-017-0012-7>
- 361 Pawlowski, J., Audic, S., Adl, S., Bass, D., Belbahri, L., Berney, C., ... Vargas, C. de. (2012).  
362 CBOL Protist Working Group: Barcoding Eukaryotic Richness beyond the Animal,  
363 Plant, and Fungal Kingdoms. *PLOS Biology*, 10(11), e1001419.  
364 <https://doi.org/10.1371/journal.pbio.1001419>
- 365 Pearman, W. S., Freed, N. E., & Silander, O. K. (2020). Testing the advantages and  
366 disadvantages of short- and long- read eukaryotic metagenomics using simulated reads.  
367 *BMC Bioinformatics*, 21(1), 220. <https://doi.org/10.1186/s12859-020-3528-4>
- 368 Peng, X., Wilken, S. E., Lankiewicz, T. S., Gilmore, S. P., Brown, J. L., Henske, J. K., ...  
369 O'Malley, M. A. (2021). Genomic and functional analyses of fungal and bacterial  
370 consortia that enable lignocellulose breakdown in goat gut microbiomes. *Nature*  
371 *Microbiology*, 6(4), 499–511. <https://doi.org/10.1038/s41564-020-00861-0>
- 372 Rotmistrovsky, K., & Agarwala, R. (2011). BMTagger: Best Match Tagger for removing human  
373 reads from metagenomics datasets. *Ftp://Ftp.Ncbi.Nlm.*  
374 *Nih.Gov/Pub/Agarwala/Bmtagger/*.
- 375 Roy, S. W., & Penny, D. (2007). Intron length distributions and gene prediction. *Nucleic Acids*  
376 *Research*, 35(14), 4737–4742. <https://doi.org/10.1093/nar/gkm281>
- 377 Saary, P., Mitchell, A. L., & Finn, R. D. (2020). Estimating the quality of eukaryotic genomes  
378 recovered from metagenomic analysis with EukCC. *Genome Biology*, 21(1), 244.  
379 <https://doi.org/10.1186/s13059-020-02155-4>
- 380 Sweetlove, L. (2011). Number of species on Earth tagged at 8.7 million. *Nature*.  
381 <https://doi.org/10.1038/news.2011.498>

- 382 Tamazian, G., Dobrynin, P., Krasheninnikova, K., Komissarov, A., Koepfli, K.-P., & O'Brien, S.  
383 J. (2016). Chromosomer: A reference-based genome arrangement tool for producing draft  
384 chromosome sequences. *GigaScience*, 5(1), 38. [https://doi.org/10.1186/s13742-016-](https://doi.org/10.1186/s13742-016-0141-6)  
385 0141-6
- 386 Torres, P. J., Edwards, R. A., & McNair, K. A. (2017). PARTIE: A partition engine to separate  
387 metagenomic and amplicon projects in the Sequence Read Archive. *Bioinformatics*,  
388 33(15), 2389–2391. <https://doi.org/10.1093/bioinformatics/btx184>
- 389 Tully, B. J., Graham, E. D., & Heidelberg, J. F. (2018). The reconstruction of 2,631 draft  
390 metagenome-assembled genomes from the global oceans. *Scientific Data*, 5, 170203.  
391 <https://doi.org/10.1038/sdata.2017.203>
- 392 Uritskiy, G. V., DiRuggiero, J., & Taylor, J. (2018). MetaWRAP—a flexible pipeline for  
393 genome-resolved metagenomic data analysis. *Microbiome*, 6(1), 158.  
394 <https://doi.org/10.1186/s40168-018-0541-1>
- 395 Vault, D., Lepère, C., Toulza, E., Iglesia, R. D. la, Poulain, J., Gaboyer, F., ... Piganeau, G.  
396 (2012). Metagenomes of the Picoalga Bathycoccus from the Chile Coastal Upwelling.  
397 *PLOS ONE*, 7(6), e39648. <https://doi.org/10.1371/journal.pone.0039648>
- 398 Waterhouse, R. M., Seppey, M., Simão, F. A., Manni, M., Ioannidis, P., Klioutchnikov, G., ...  
399 Zdobnov, E. M. (2017). BUSCO applications from quality assessments to gene prediction  
400 and phylogenomics. *Molecular Biology and Evolution*.  
401 <https://doi.org/10.1093/molbev/msx319>
- 402 West, P. T., Probst, A. J., Grigoriev, I. V., Thomas, B. C., & Banfield, J. F. (2018). Genome-  
403 reconstruction for eukaryotes from complex natural microbial communities. *Genome*  
404 *Research*, 28(4), 569–580. <https://doi.org/10.1101/gr.228429.117>

- 405 Zhang, L., Zhou, X., Weng, Z., & Sidow, A. (2020). De novo diploid genome assembly for  
406 genome-wide structural variant detection. *NAR Genomics and Bioinformatics*, 2(1),  
407 lqz018. <https://doi.org/10.1093/nargab/lqz018>
- 408 Zhu, Q., Mai, U., Pfeiffer, W., Janssen, S., Asnicar, F., Sanders, J. G., ... Knight, R. (2019).  
409 Phylogenomics of 10,575 genomes reveals evolutionary proximity between domains  
410 Bacteria and Archaea. *Nature Communications*, 10(1), 5477.  
411 <https://doi.org/10.1038/s41467-019-13443-4>

412

### 413 **Data Accessibility and Benefit-Sharing**

#### 414 **Data Accessibility Statement**

415 The metagenome-assembled genomes (MAGs) obtained in this study are available at the  
416 National Centre for Biotechnology Information (<https://www.ncbi.nlm.nih.gov/>) with the  
417 BioProject accession PRJNA810309. The MAGs are available under the sample accessions  
418 SAMN26244030- SAMN26244039, SAMN26244052-SAMN26244057, SAMN26244171-  
419 SAMN26244173, SAMN26302835-SAMN26302918, SAMN26302921-SAMN26302929,  
420 SAMN26302933-SAMN26302978, SAMN26302997-SAMN26303001, SAMN26303005-  
421 SAMN26303043, SAMN26303045, SAMN26303049, SAMN26303053-SAMN26303054,  
422 SAMN26303056, SAMN26303058, SAMN26303060, SAMN26303062-SAMN26303065,  
423 SAMN26329017-SAMN26329047, SAMN26329100-SAMN26329115, SAMN26329126-  
424 SAMN26329131, SAMN26329141-SAMN26329143, SAMN26329147-SAMN26329313,  
425 SAMN26329315-SAMN26329336 .

426 The assemblies of the reference genomes used to perform pairwise alignments are available at  
427 National Centre for Biotechnology Information (<https://www.ncbi.nlm.nih.gov/>) under the  
428 accession identifiers GCA\_000146045.2, GCA\_003054445.1, GCA\_000090985.2,  
429 GCA\_000027005.1 and GCA\_002220235.1.

#### 430 **Benefit-Sharing Statement**

431 Benefits Generated: Benefits from this research accrue from the sharing of our data and results  
432 on public databases as described. Additionally, the results from this research will help guide  
433 future work in the design and execution of genome-centric studies by fostering a multi-domain  
434 approach.

#### 435 **Author contributions**

436 JPS and UNR developed the concept of the study. UNR is the main supervisor of the study. RBT  
437 downloaded all sequencing data. RBT generated all data for analysis. AB and JPS performed all  
438 data analysis. JPS, ABS and UNR wrote the manuscript. All authors read and approved the  
439 manuscript.

#### 440 **Competing interests**

441 The authors declare that they have no competing interests.

#### 442 **Funding**

443 This work was supported by the Helmholtz Young Investigator grant VH-NG-1248 Micro' Big  
444 Data'.

#### 445 **Figure Legends**

**Figure 1** - Sankey plot showing taxonomic distribution of the recovered Eukaryotic bins (EukBins) and heatmap showing the number of EukBins recovered per Biome (retrieved from <https://webapp.ufz.de/tmdb/> and manually curated based on the sample data).

**Figure 2** - Mapping of assembled chromosomes for an eukaryotic bin (query) to the chromosomes of the reference genome. **A:** *Micromonas commoda* (CTeuk-1336); **B:** *Saccharomyces cerevisiae* (CTeuk-1741). <sup>[1]</sup> Vault D. et al., 2004, The Roscoff Culture Collection (RCC): a collection dedicated to marine picoplankton. *Nova Hedwigia* 79:49-70; <sup>[2]</sup> [https://commons.wikimedia.org/wiki/File:Saccharomyces\\_cerevisiae\\_YGC\\_colonies\\_50.jpg](https://commons.wikimedia.org/wiki/File:Saccharomyces_cerevisiae_YGC_colonies_50.jpg)

# Taxonomic level

# Biome

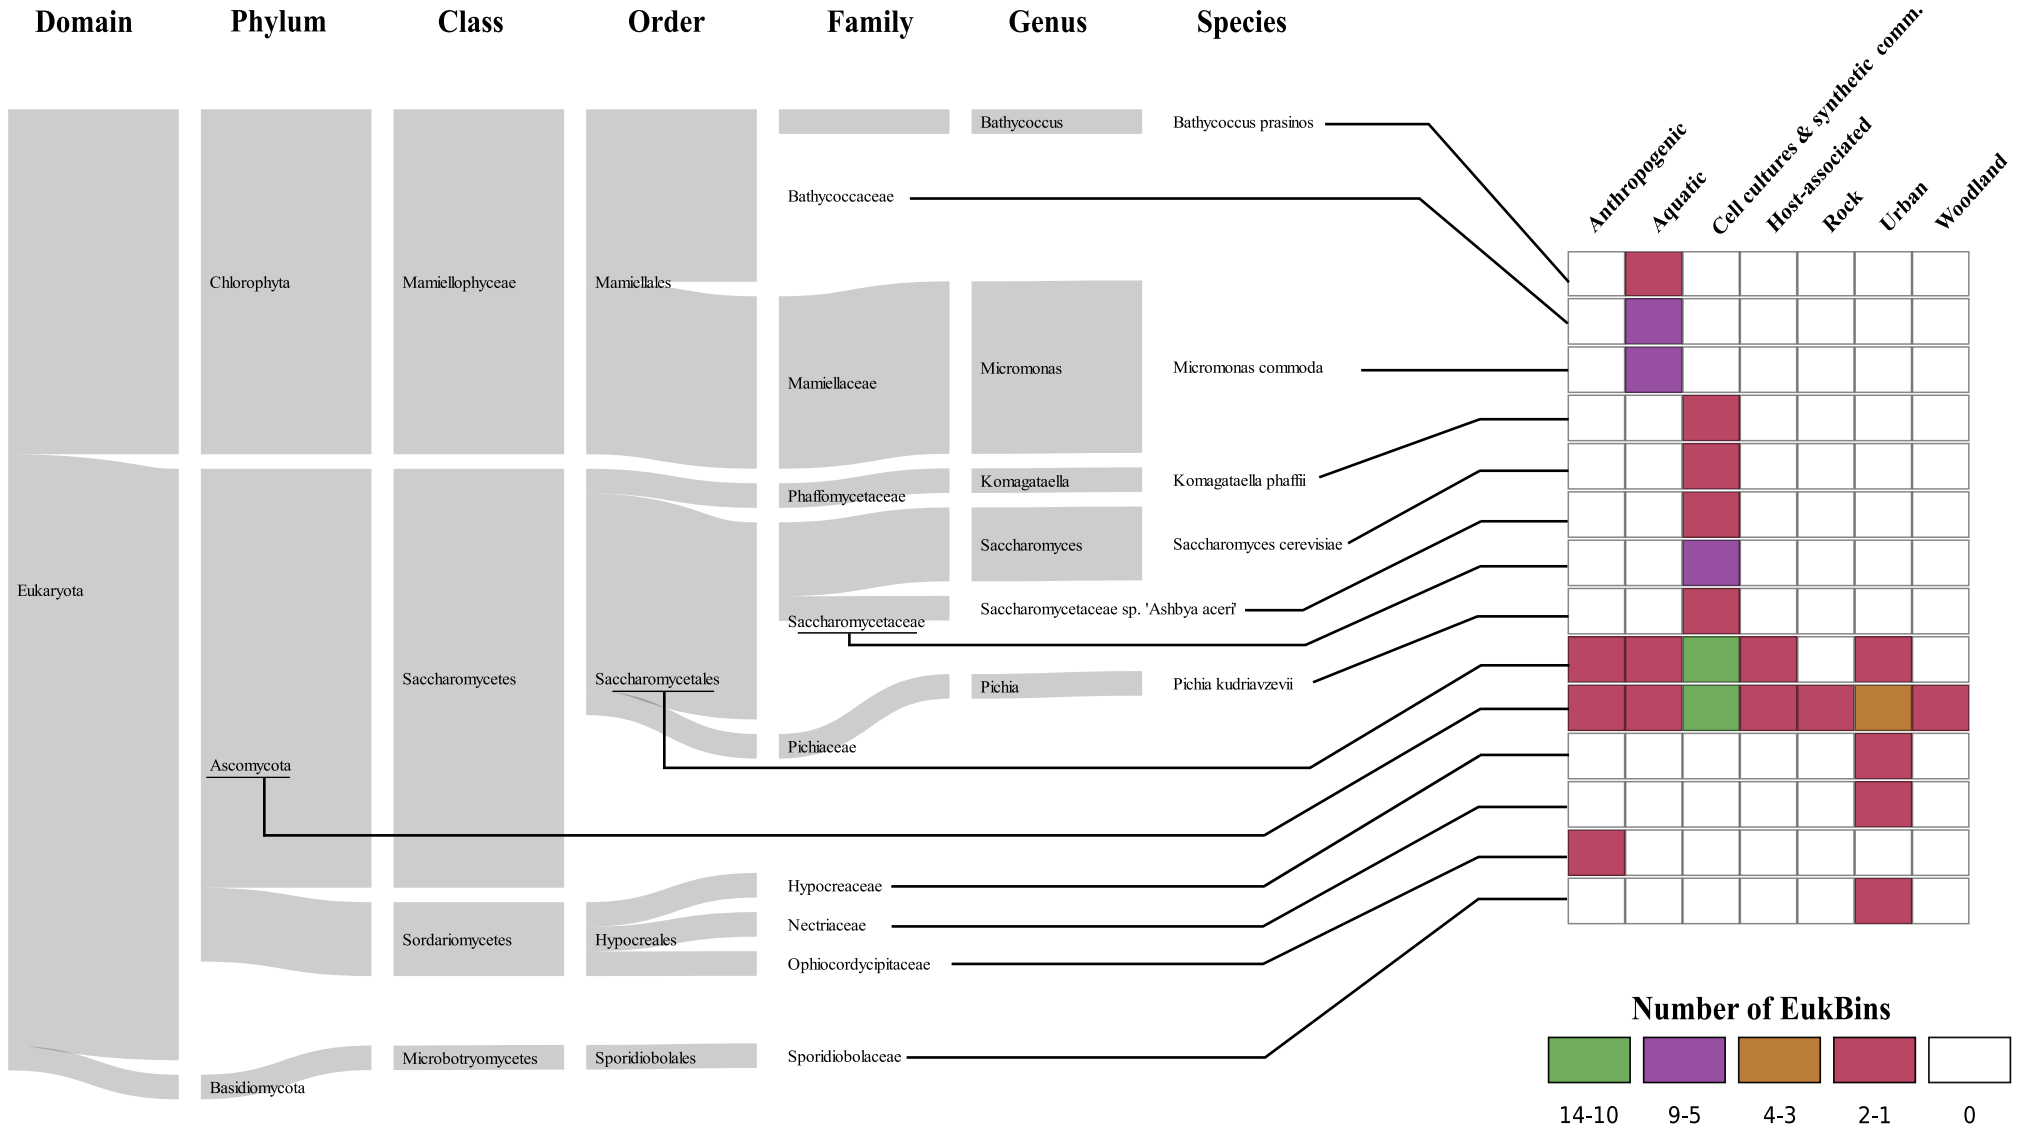

# A *Micromonas commoda* (green algae)

## Reference

### chromosome

bioRxiv preprint doi: <https://doi.org/10.1101/2022.04.07.487146>; this version posted April 10, 2022. The copyright holder for this preprint (which was not certified by peer review) is the author/funder, who has granted bioRxiv a license to display the preprint in perpetuity. It is made available under a [CC-BY-NC-ND 4.0 International license](https://creativecommons.org/licenses/by-nc-nd/4.0/).

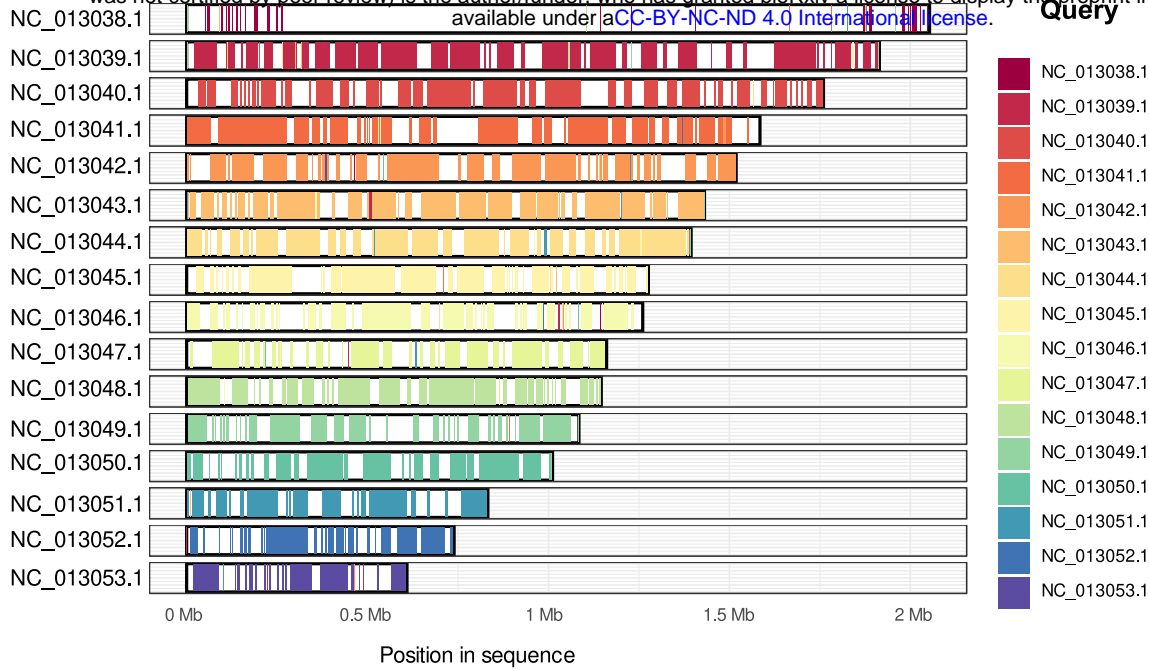

# B *Saccharomyces cerevisiae* (Baker's yeast)

## Reference

### chromosome

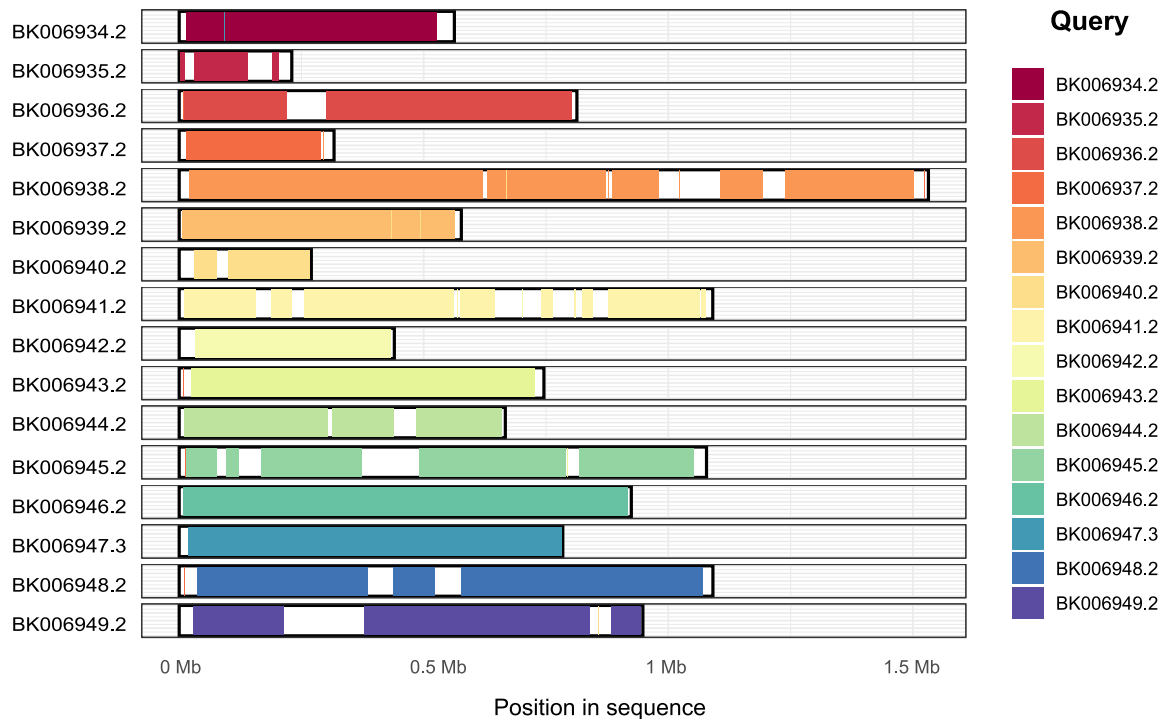

Source: https://www.biorxiv.org/content/10.1101/2022.04.07.487146v1.full.pdf
